# Supplementary material
Source: HighWire-hosted journal article supplement (https://bmjopenquality.bmj.com/highwire/filestream/136164/field_highwire_adjunct_files/0/ds2057.xlsx)
Supplement: ds2057.xlsx [file ds2057.xlsx]

## Sheet: Sheet1
	September 2011		March 2012		October 2012
	n	%	n	%	n	%
Full compliance (VTE form & appropriate prophylaxis)	23	57.5	34	87.1795	36	90
Partial compliance (VTE form not completed, appropriate prophylaxis given)	17	42.5	2	5.12821	3	7.5
Non-compliant (no appropriate prophylaxis)	0	0	3	7.69231	1	2.5
Table 1: Summary of compliance with NICE guideline CG92
	2011-09-01		2012-03-01		2012-10-01
	n	%	n	%	n	%
VTE form completed	24	60	34	87.18	36	90
ICP used	33	82.5	38	97.44	37	92.5
Total number of ICPs completed with VTE form filled in	24	72.73	34	89.47	34	91.89
Trauma admission protocol with VTE assessment completed	13	65	17	85	17	89.47
NOF admission protocol with VTE assessment completed	11	84.62	17	94.44	17	94.44
VTE assessment in notes	2	5	3	10.34	0	0
Table 2: Summary of VTE assessments completed
	2011-09-01		2012-03-01		2012-10-01
	n	%	n	%	n	%
Patient appropriately prescribed LMWH?	31	79.4872	30	88.2353	33	97
Patient prescribed TEDS	23	57.5	20	51.28	22	55
Patient appropriately prescribed foot pumps	5	12.5	0	0	0	0
Patients developing DVT/PE	0	0	0	0	0	0
Table 3: VTE prophylaxis prescribed
	n	%
no recorded PMS assessment	2	10.5
Of those with assessment, numbers where assessment the same as prescription chart	21	55.2632
Of those incorrectly recorded, difference due to incorrect recording of:
LMWH and TEDS	3	17.6471
LMWH alone	1	5.88235
TEDS alone	13	76.4706
Where TEDS incorrectly recorded due to:
TEDS recorded on PMS, not actually prescribed	10	76.9231
TEDS not recorded on PMS, but were prescribed	3	23.0769
Table 4: Correlations between VTE prophylaxis recorded on PMS and that actually prescribed on prescription chart
